# Supplementary material for: The influence of pH on the stability of antazoline: kinetic analysis
Source: Royal Society of Chemistry journal article supplement (doi:10.1039/c5ra09043a), 2015-01-01
Supplement: c5ra09043a1.pdf [file c5ra09043a1.pdf]

## The influence of pH on the stability of antazoline: Kinetic analysis

Kārlis Bērziņš,<sup>a</sup> Ilze Grante,<sup>a</sup> Ilva Nakurte,<sup>a</sup> Andris Actiņš<sup>a</sup>

<sup>a</sup> University of Latvia, Faculty of Chemistry, Kr. Valdemara iela 48, Riga, LV-1013, Latvia

### Supplementary information

**Table S1.** Experimental and theoretical molar absorption coefficient ( $\epsilon$ ) values of the pure components (ANT and ABA) at two characteristic wavelengths (293 and 325 nm)

| pH  | ANT ( $\lambda = 293$ nm)                                  |                                                                       | ABA ( $\lambda = 293$ nm)                                  |                                                                       | ABA ( $\lambda = 325$ nm)                                  |                                                                       |
|-----|------------------------------------------------------------|-----------------------------------------------------------------------|------------------------------------------------------------|-----------------------------------------------------------------------|------------------------------------------------------------|-----------------------------------------------------------------------|
|     | Experimental values, mol·L <sup>-1</sup> ·cm <sup>-1</sup> | Theoretical (optimised) values, mol·L <sup>-1</sup> ·cm <sup>-1</sup> | Experimental values, mol·L <sup>-1</sup> ·cm <sup>-1</sup> | Theoretical (optimised) values, mol·L <sup>-1</sup> ·cm <sup>-1</sup> | Experimental values, mol·L <sup>-1</sup> ·cm <sup>-1</sup> | Theoretical (optimised) values, mol·L <sup>-1</sup> ·cm <sup>-1</sup> |
| 7.4 | 1990                                                       | 2001                                                                  | 1791                                                       | 1795                                                                  | 756                                                        | 760                                                                   |
| 6.0 | 1978                                                       | 1969                                                                  | 1785                                                       | 1788                                                                  | 745                                                        | 741                                                                   |
| 5.0 | 1944                                                       | 1950                                                                  | 1784                                                       | 1788                                                                  | 742                                                        | 741                                                                   |
| 4.0 | 1923                                                       | 1920                                                                  | 1782                                                       | 1774                                                                  | 738                                                        | 732                                                                   |
| 3.0 | 1892                                                       | 1898                                                                  | 1777                                                       | 1775                                                                  | 734                                                        | 735                                                                   |
